# Supplementary material for: Novel flax orbitide derived from genetic deletion
Source: PubMed Central journal article supplement (PMC5963108; doi:10.1186/s12870-018-1303-8), 2018-05-21
Supplement: 12870_2018_1303_MOESM2_ESM.pdf [file 12870_2018_1303_MOESM2_ESM.pdf]

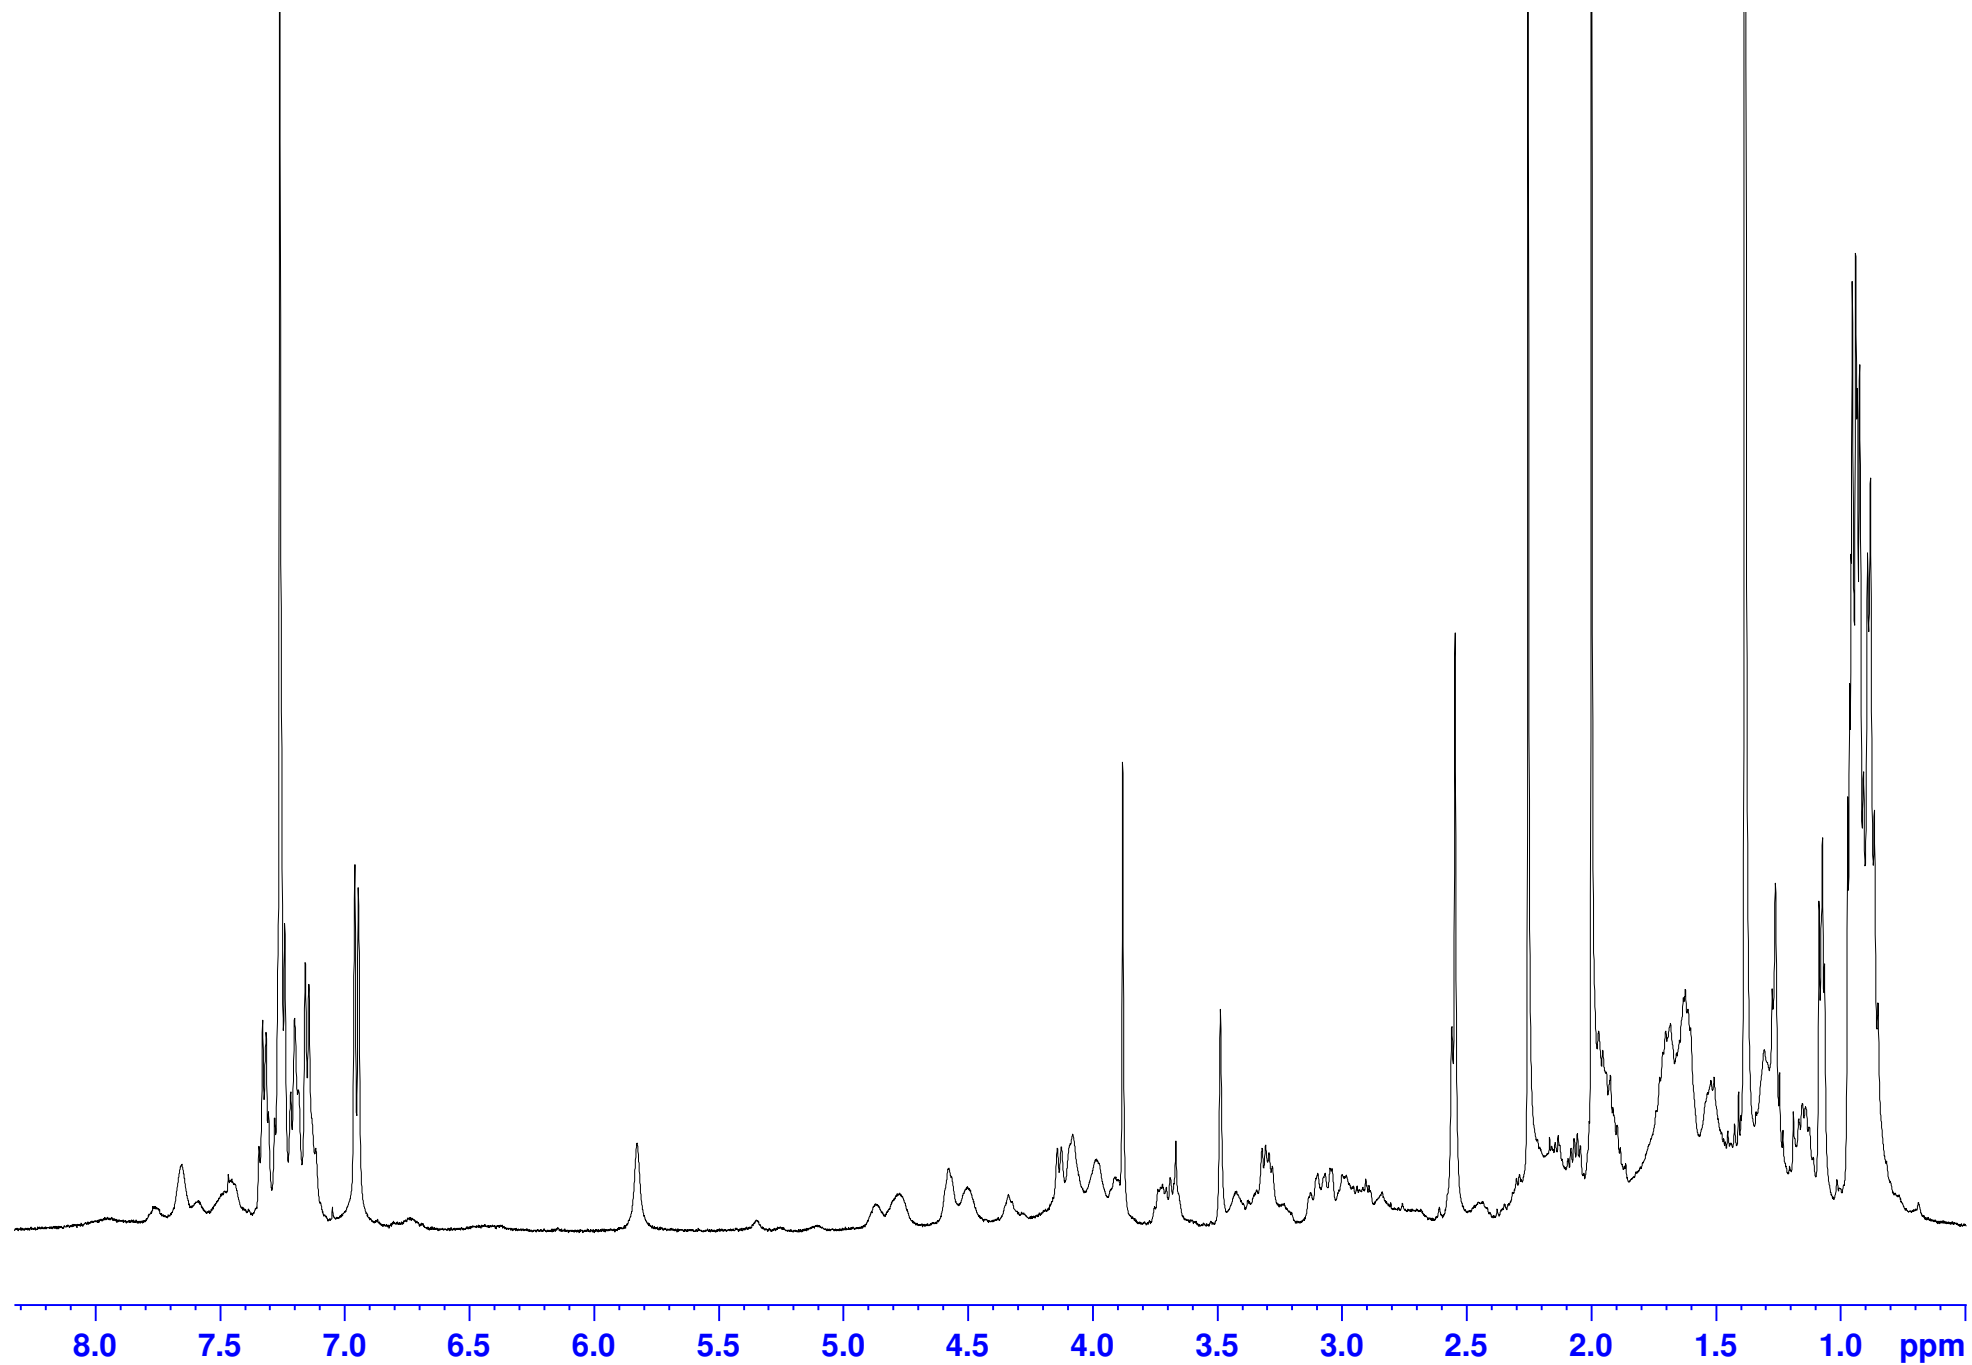

**Figure S1.** <sup>1</sup>H NMR spectrum of [1-9-N $\alpha$ C]-OLIPFFLI (19).
