# Supplementary material for: Novel flax orbitide derived from genetic deletion
Source: PubMed Central journal article supplement (PMC5963108; doi:10.1186/s12870-018-1303-8), 2018-05-21
Supplement: 12870_2018_1303_MOESM4_ESM.pdf [file 12870_2018_1303_MOESM4_ESM.pdf]

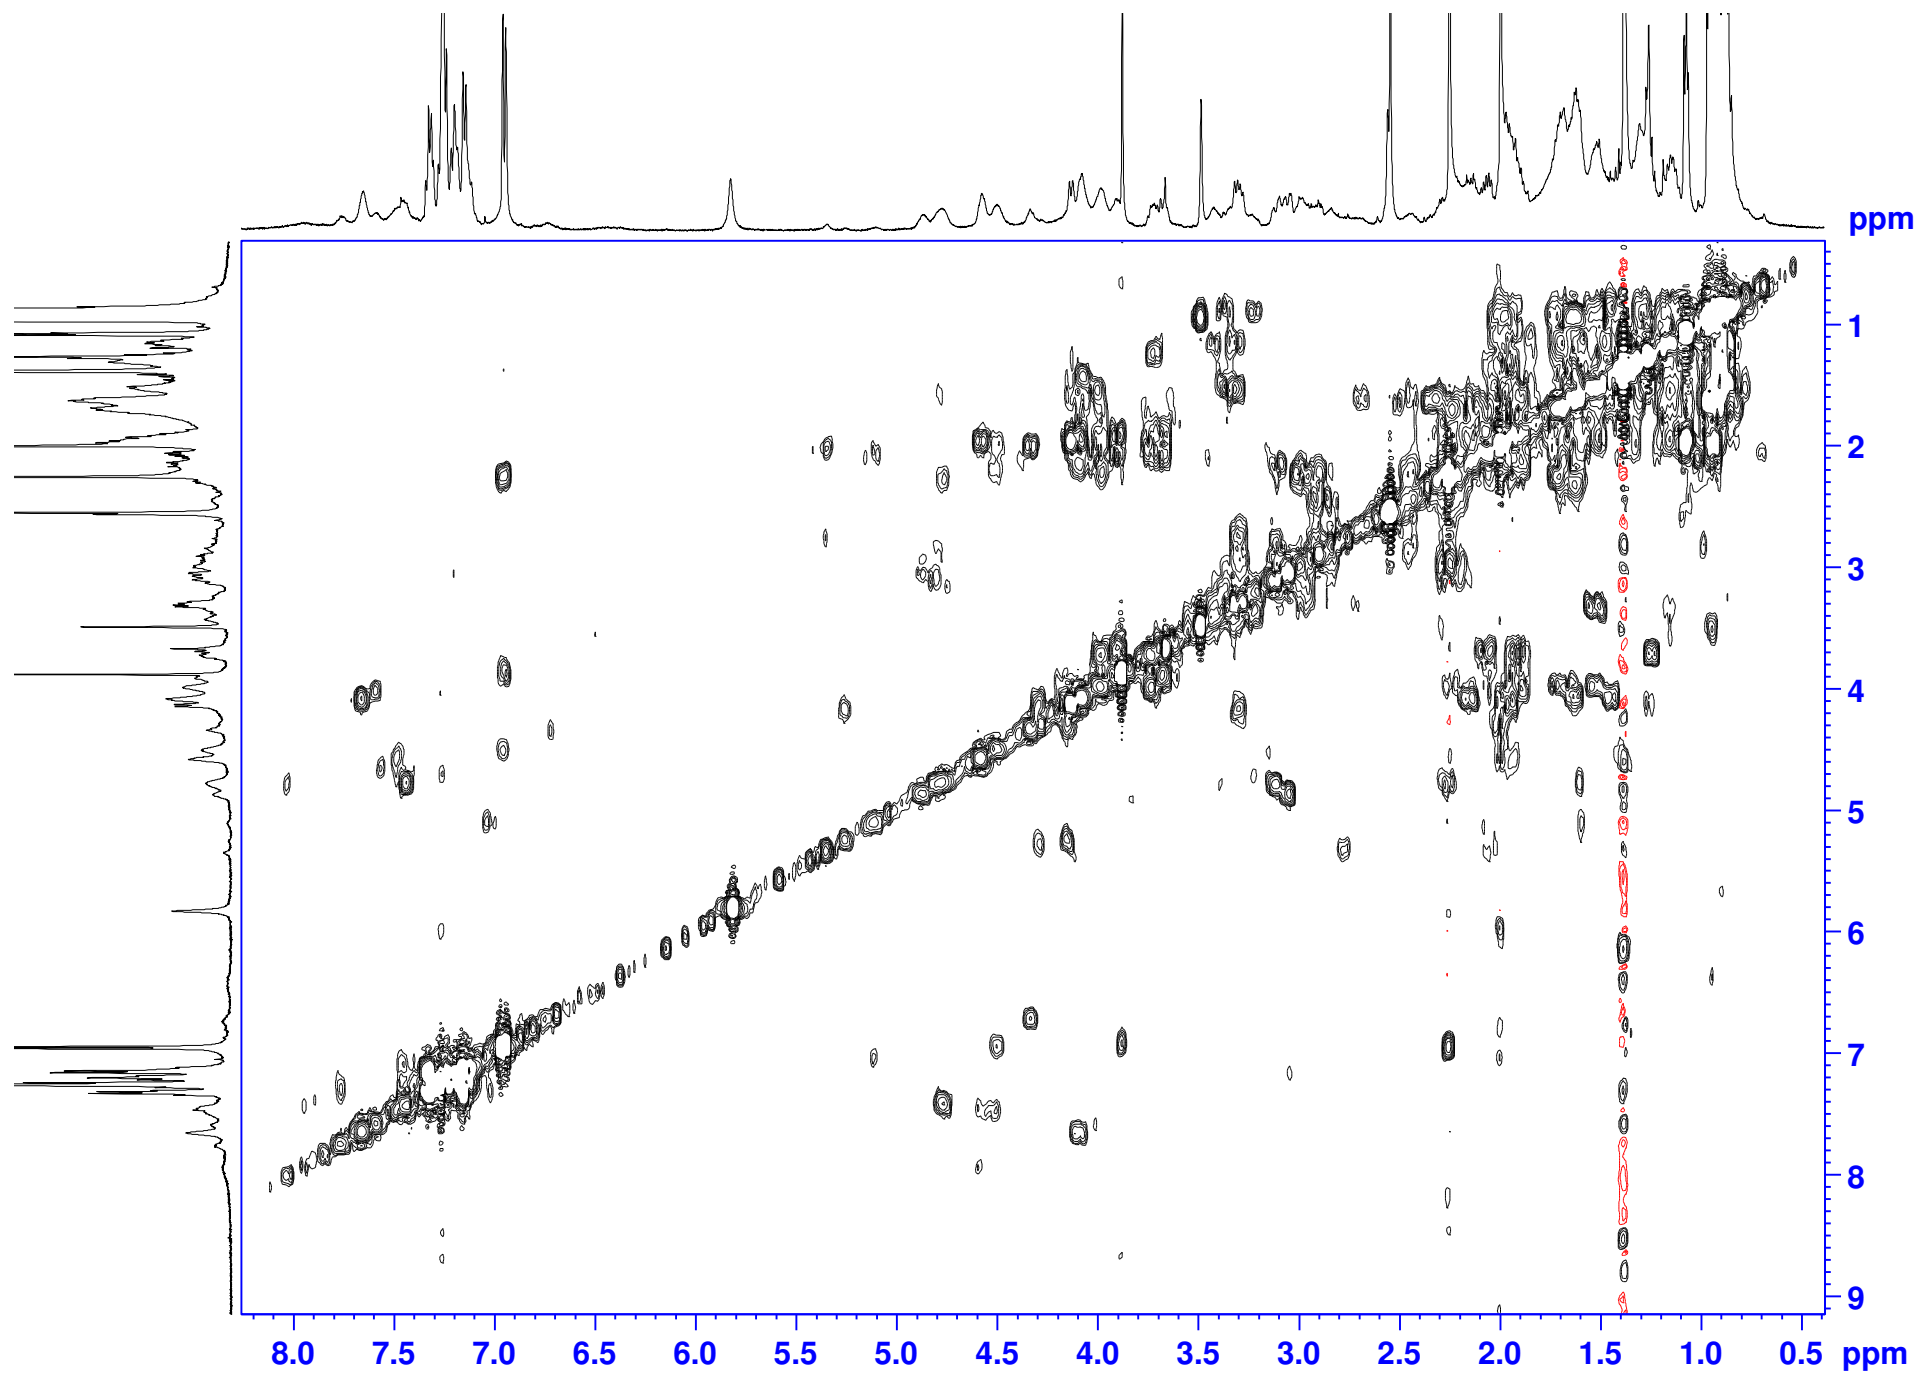

Figure S3.  $^1\text{H}$ - $^1\text{H}$  COSY spectrum of [1-9-N $\alpha$ C]-OLIPPFLLI (19).
